# Supplementary figures and images for: Generation of Active Protein Phosphatase 2A Is Coupled to Holoenzyme Assembly
Source: PLOS journal article supplement (doi:10.1371/journal.pbio.0050155), 2007-06-01

# Suppl. Figure S2

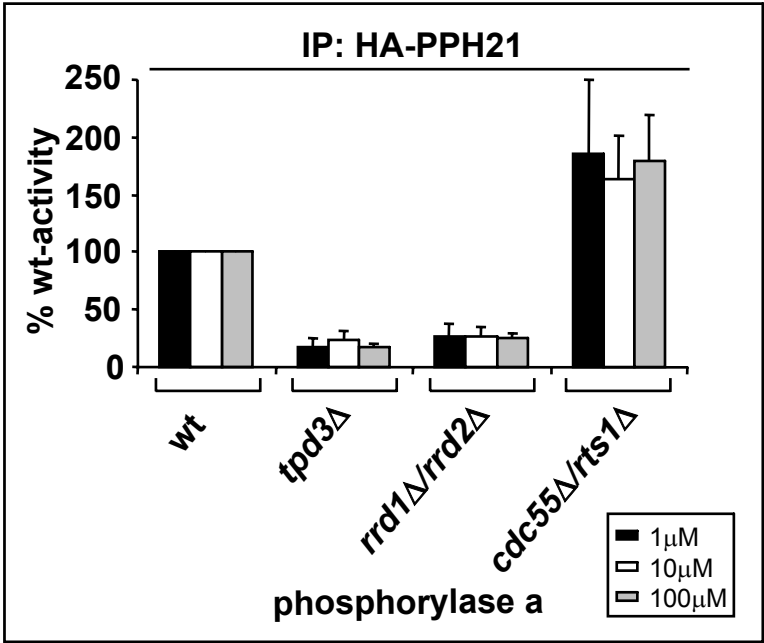

Supplement: S2 (10.1371/journal.pbio.0050155.s002) [file journal.pbio.0050155.s002]
